# Supplementary material
Source: publisher figshare collection journal article supplement (https://gsapubs.figshare.com/ndownloader/files/39380780)
Supplement: Supplementary file 1 [file 39380780]

## Sheet: RM
grain	name /	207Pba	Ub	Pbb	Thb	238Uc	±2s	207Pbc	±2s	rhod	Session
	sample	(cps)	(ppm)	(ppm)	U	206Pb	(%)	206Pb	(%)
RM0
N 01	NIST 614	174961	0.837951	2.28852	0.951857	1.232	0.305695	0.8721	0.305389	2.97309e-16	seq1
N 02	NIST 614	171764	0.828122	2.24818	0.944818	1.235	0.293692	0.8707	0.302534	0	seq1
N 33	NIST 614	171692	0.834113	2.32013	0.881458	1.24	0.299122	0.87	0.33385	2.77939e-16	seq1
N 34	NIST 614	173592	0.84205	2.34516	0.908629	1.241	0.303733	0.8718	0.315432	0	seq1
N 69	NIST 614	168221	0.819571	2.28251	0.883998	1.243	0.279468	0.8719	0.329654	1.50637e-16	seq1
N 70	NIST 614	169418	0.824044	2.29419	0.900975	1.241	0.439513	0.8705	0.245501	-2.57232e-16	seq1
N 102	NIST 614	168336	0.822624	2.27553	0.910766	1.242	0.37243	0.871	0.272142	0	seq1
N 103	NIST 614	166824	0.820685	2.27911	0.889544	1.238	0.387684	0.8689	0.295058	-2.42642e-16	seq1
N 146	NIST 614	166001	0.81239	2.26261	0.868172	1.237	0.372842	0.8702	0.241229	0	seq1
N 147	NIST 614	168448	0.818737	2.29574	0.928516	1.234	0.41482	0.8699	0.281958	0	seq1
N 194	NIST 614	166365	0.82299	2.29414	0.964057	1.238	0.312168	0.8702	0.33921	0	seq1
N 195	NIST 614	165287	0.81222	2.27961	0.934552	1.234	0.293039	0.8714	0.234711	0	seq1
N 238	NIST 614	162627	0.813704	2.26346	0.930708	1.237	0.355159	0.8705	0.268497	-2.91063e-16	seq1
N 239	NIST 614	164483	0.804384	2.2607	0.883934	1.235	0.347781	0.873	0.292435	1.36454e-16	seq1
N 283	NIST 614	162677	0.809202	2.27469	0.862055	1.233	0.327687	0.8725	0.235353	0	seq1
N 328	NIST 614	161723	0.823118	2.28863	0.917525	1.242	0.356163	0.8731	0.325026	2.39764e-16	seq1
N 329	NIST 614	156611	0.79803	2.22437	0.851574	1.237	0.295082	0.8707	0.344671	0	seq1
N 383	NIST 614	156419	0.817832	2.26139	0.894452	1.243	0.272263	0.8714	0.311579	-1.63592e-16	seq1
N 384	NIST 614	159496	0.821088	2.28471	0.916701	1.242	0.360551	0.8706	0.292623	0	seq1
N 450	NIST 614	158026	0.829063	2.31147	0.867448	1.237	0.346748	0.871	0.251089	1.59397e-16	seq1
N 451	NIST 614	158606	0.832722	2.32168	0.898504	1.236	0.328196	0.8717	0.280558	-1.50718e-16	seq1
N 505	NIST 614	156973	0.818773	2.2849	0.918743	1.238	0.333807	0.8713	0.370204	0	seq1
N 506	NIST 614	163759	0.86602	2.41201	0.995804	1.237	0.377029	0.8684	0.240409	3.06215e-16	seq1
N 284	NIST 614	165245	0.826845	2.30568	0.950941	1.237	0.29168	0.871	0.369467	-2.57554e-16	seq1
RM1
Calcit 04	WC-1	6796.58	3.52412	0.155688	9.02739e-05	23.12	1.71577	0.1086	3.09932	1.67022e-16	seq1
Calcit A03	WC-1	8292.34	3.95068	0.188401	0.000456387	22.16	1.72598	0.1313	3.71047	2.77375e-16	seq1
Calcit 330	WC-1	5748.08	3.14801	0.147697	0.000139455	22.96	1.70474	0.1192	3.74179	6.96195e-17	seq1
Calcit 35	WC-1	6231.68	2.83681	0.140587	0.000226941	22.69	1.88178	0.1213	3.03642	-2.33163e-16	seq1
Calcit 36	WC-1	5813.56	3.28062	0.151302	6.59952e-05	23.04	1.71001	0.101	2.62834	2.96423e-16	seq1
Calcit 67	WC-1	7116.37	3.01089	0.15538	0.000341576	22.41	1.70895	0.1298	2.81088	-3.69792e-16	seq1
Calcit 68	WC-1	10052.5	2.81963	0.176802	9.94934e-05	20.69	2.08591	0.1802	5.34132	0	seq1
Calcit 102	WC-1	10489.4	2.44805	0.180319	0.000180538	19.59	3.17072	0.2063	3.02218	0	seq1
Calcit 103	WC-1	8376.43	3.81331	0.19027	0.000200195	22.73	1.7008	0.1225	3.58754	0	seq1
Calcit 146	WC-1	6245.72	2.48292	0.127927	0.00016649	22.42	2.40442	0.1347	7.49178	-6.40987e-16	seq1
Calcit 147	WC-1	5105.58	2.60318	0.125113	0.000164769	22.88	1.79992	0.11	3.42491	0	seq1
Calcit 196	WC-1	7689.78	3.14623	0.16426	0.000348443	22.44	1.73134	0.1356	2.71478	0	seq1
Calcit 197	WC-1	9419.18	3.72598	0.207923	8.57092e-05	21.47	2.04997	0.1558	5.04395	6.01285e-16	seq1
Calcit 240	WC-1	16761.9	2.93176	0.250508	0.000279147	18.4	6.77685	0.2466	7.52627	5.5724e-16	seq1
Calcit 241	WC-1	23331.6	3.10741	0.324475	7.9781e-05	16.99	5.16303	0.2978	4.19941	4.91573e-16	seq1
Calcit 285	WC-1	12857.1	3.19066	0.223023	0.000254273	20.25	4.01546	0.1913	7.29263	0	seq1
Calcit 286	WC-1	5233.23	2.44212	0.126247	0.000155665	22.34	2.15575	0.1227	4.35139	1.89367e-16	seq1
Calcit 331	WC-1	8408.37	3.67373	0.188588	0.000367568	22.69	1.72657	0.1201	2.54543	-2.02094e-16	seq1
Calcit 386	WC-1	12077.3	2.77916	0.228775	0.000135234	17.84	4.40004	0.2508	6.86824	-1.1756e-16	seq1
Calcit 452	WC-1	8925.01	2.96841	0.17464	0.000149461	21.41	2.26108	0.1646	6.22065	-5.68318e-16	seq1
Calcit 453	WC-1	22817.8	2.94032	0.31855	0.000271021	16.41	5.595	0.3047	5.37808	-1.18068e-16	seq1
Calcite 507	WC-1	8770.39	2.93308	0.177157	0.000126329	20.98	2.19286	0.1689	64.8203	-6.27353e-15	seq1
Calcite 508	WC-1	8471.27	4.10133	0.204077	0.000366923	23.06	1.80106	0.1274	3.85434	1.27945e-16	seq1
RM2
ZD 05	ZD	33919.7	1.95698	0.319167	0.0541981	12.44	4.41222	0.4445	4.64683	-1.73279e-16	seq1
ZD 37	ZD	964205	0.923611	9.69053	0.075135	0.3267	15.5439	0.8129	2.39224	0	seq1
ZD 54	ZD	39623.9	1.83328	0.384207	0.0544885	11.08	3.1019	0.4948	3.77773	3.03181e-16	seq1
ZD 71	ZD	85392.3	1.46052	0.783113	0.0746379	6.067	4.36651	0.6464	1.46817	0	seq1
ZD 106	ZD	151756	1.61231	1.53113	0.0678206	3.254	9.78528	0.7251	2.63846	0	seq1	0
ZD 150	ZD	57338.5	2.07128	0.590858	0.0596917	8.648	5.16424	0.556	3.6966	1.86102e-16	seq1
ZD 198	ZD	165132	2.29887	1.57921	0.0811827	4.249	4.4101	0.7054	1.07438	0	seq1
ZD 242	ZD	36991.6	2.49383	0.445359	0.0674114	12.37	3.09511	0.4484	1.87189	3.06601e-16	seq1
ZD 287	ZD	43423.3	2.24378	0.470146	0.0618443	11	5.77144	0.4863	4.63978	2.65344e-16	seq1
ZD 332	ZD	45281.5	1.96759	0.473318	0.0612851	9.763	4.68664	0.52	3.42247	2.21492e-16	seq1
ZD 387	ZD	27665.7	2.04775	0.332107	0.0549583	12.76	3.76926	0.4159	4.86508	-9.68688e-17	seq1
ZD 509	ZD	602589	1.90238	6.48382	0.068649	1.014	15.002	0.7915	2.41891	-7.83218e-16	seq1
ZD 482	ZD	25095.9	1.86041	0.301629	0.0590857	12.61	3.98236	0.4234	5.25547	-2.54624e-16	seq1
ZD 483	ZD	54815.6	2.10122	0.585851	0.0571445	8.926	6.03389	0.5537	3.80163	0	seq1
ZD 484	ZD	77271.4	1.72844	0.862115	0.0656113	5.64	4.87361	0.6464	2.71697	0	seq1
ZD 485	ZD	56661.4	2.37596	0.67155	0.0570921	8.962	5.08039	0.5314	4.90181	-1.42661e-16	seq1
ZD 486	ZD	645799	2.06424	5.67903	0.0539304	1.185	11.3159	0.7934	1.77485	0	seq1
ZD 487	ZD	26358.3	2.31058	0.351283	0.0545177	13.32	2.87753	0.4019	3.40709	0	seq1
ZD 488	ZD	41582.1	2.63645	0.5176	0.0635939	11.51	2.93453	0.4754	3.55305	1.70369e-16	seq1
ZD 489	ZD	54786	2.26124	0.650912	0.0687483	8.596	3.45772	0.5449	2.19046	4.69066e-16	seq1
RM0
N 01	NIST614	111464	0.678929	1.88676	0.899407	1.233	0.633734	0.8716	0.589001	1.48716e-16	seq2
N 02	NIST614	109747	0.674859	1.86425	0.905506	1.232	0.424972	0.8699	0.57285	2.28023e-16	seq2
N 33	NIST614	128831	0.819878	2.24037	0.913278	1.249	0.516507	0.8702	0.312082	3.44378e-16	seq2
N 34	NIST614	129639	0.812346	2.24404	0.910516	1.24	0.493254	0.8742	0.417513	0	seq2
N 67	NIST614	183612	1.15341	3.20644	0.924041	1.242	0.331984	0.8693	0.334255	0	seq2
N 68	NIST614	127603	0.82664	2.26365	0.907318	1.246	0.439902	0.8724	0.449118	-2.80973e-16	seq2
N 102	NIST614	126299	0.837705	2.33603	0.918353	1.229	0.352875	0.8621	0.355681	-2.21141e-16	seq2
N 103	NIST614	130587	0.845935	2.35931	0.914071	1.24	0.378679	0.8694	0.521468	0	seq2
N 146	NIST614	122845	0.833126	2.31625	0.893628	1.243	0.753808	0.8765	0.505327	0	seq2
N 147	NIST614	123155	0.834731	2.33784	0.916751	1.225	0.526123	0.8707	0.457336	0	seq2
N 194	NIST614	116222	0.816585	2.29938	0.897901	1.224	0.354166	0.8713	0.425077	-1.84364e-16	seq2
N 195	NIST614	112334	0.806126	2.22849	0.908127	1.242	0.378158	0.8695	0.468535	0	seq2
N 238	NIST614	113629	0.831475	2.32995	0.896749	1.235	0.54925	0.8726	0.415514	0	seq2
N 239	NIST614	109946	0.816502	2.26503	0.899748	1.244	0.393271	0.8741	0.518023	0	seq2
N 283	NIST614	105267	0.807511	2.24541	0.914654	1.241	0.417056	0.875	0.561042	1.18621e-16	seq2
N 284	NIST614	105122	0.814406	2.24115	0.909995	1.253	0.438882	0.8738	0.485809	0	seq2
N 328	NIST614	106677	0.823911	2.3363	0.909331	1.231	0.636555	0.8697	0.457589	-1.90576e-16	seq2
N 329	NIST614	102491	0.809746	2.26108	0.91244	1.237	0.239783	0.8722	0.398045	7.27007e-17	seq2
N 383	NIST614	102877	0.827231	2.33823	0.917228	1.232	0.715328	0.87	0.328034	0	seq2
N 384	NIST614	98203.5	0.807414	2.05897	0.910575	1.239	0.412614	0.8687	0.494928	0	seq2
N 450	NIST614	96344	0.835941	2.30184	0.917087	1.241	0.612692	0.8654	0.349478	0	seq2
N 451	NIST614	94319.8	0.821289	2.24687	0.913266	1.247	0.662014	0.8736	0.609174	-1.37648e-16	seq2
N 523	NIST614	97227.7	0.820377	2.34889	0.885662	1.226	0.858716	0.8685	0.500932	-2.58096e-16	seq2
N 524	NIST614	91639.4	0.806779	2.24636	0.910845	1.239	0.371574	0.8705	0.464983	0	seq2
N 597	NIST614	93727	0.818465	2.35634	0.904607	1.226	0.607581	0.871	0.53542	1.7064e-16	seq2
N 598	NIST614	88708.4	0.816117	2.2562	0.920316	1.253	0.546795	0.8738	0.513207	0	seq2
RM1
C03	WC-1	20967.6	3.61357	0.381231	0.000270356	17.11	4.35087	0.2919	3.76835	0	seq2
C04	WC-1	18474.6	3.82038	0.341215	0.000255715	18.42	4.40171	0.2788	7.93657	1.01696e-16	seq2
C35	WC-1	17560.6	3.5557	0.328025	0.00025128	17.9	3.97467	0.2989	4.67909	1.91028e-16	seq2
C36	WC-1	23214.8	3.60959	0.417954	0.0014224	15.69	5.38564	0.3313	7.39042	-1.78519e-16	seq2
C69	WC-1	16425.9	3.64513	0.322113	0.000280232	18.29	4.16857	0.2808	5.80827	-5.8693e-16	seq2
C70	WC-1	33275.7	3.24857	0.517164	0.000190189	13.51	13.3509	0.3806	14.3402	-2.96903e-16	seq2
C104	WC-1	18006.4	3.71187	0.351484	0.000143422	17.73	5.07787	0.2885	8.26033	2.54099e-16	seq2
C105	WC-1	23053.9	3.43033	0.428374	0.000239593	15.15	6.13225	0.3561	7.36305	1.57366e-16	seq2
C148	WC-1	14158.1	3.68599	0.321138	0.000234826	17.94	4.00748	0.2597	2.90647	0	seq2
C149	WC-1	21449.9	3.56448	0.416423	0.000409254	15.83	5.29032	0.3404	5.04669	-1.33067e-16	seq2
C196	WC-1	17415.5	3.51078	0.359772	0.000267746	17.07	5.16787	0.3102	5.98633	1.14839e-16	seq2
C197	WC-1	17314.3	3.6779	0.363167	0.000231724	17.62	4.79438	0.3058	4.98849	1.48545e-16	seq2
C240	WC-1	12186.4	3.68125	0.300874	0.000278748	18.69	4.29106	0.2444	3.77675	2.19219e-16	seq2
C241	WC-1	13168.7	3.44038	0.304132	0.000240053	18.27	5.36151	0.2706	8.68514	0	seq2
C285	WC-1	13701.9	3.76266	0.331491	0.000353811	18.34	4.53902	0.2684	5.7056	1.37182e-16	seq2
C286	WC-1	15045	3.49745	0.369372	0.000167351	15.65	7.14134	0.3025	6.50077	0	seq2
C330	WC-1	8473.37	2.94675	0.229906	0.000152884	18.92	4.13755	0.2323	5.80211	-1.47989e-16	seq2
C331	WC-1	17604.1	3.72162	0.40011	0.000297479	16.63	6.9266	0.314	9.60552	-2.13589e-16	seq2
C385	WC-1	8041.13	3.09263	0.228872	0.000283134	19.74	4.12593	0.2222	4.14187	0	seq2
C386	WC-1	216126	3.27819	3.41768	0.000234189	3.589	19.4909	0.7619	2.56749	2.27179e-15	seq2
C452	WC-1	8644	3.16453	0.24601	0.000352796	19.09	4.23454	0.2349	4.81198	-1.74353e-16	seq2
C453	WC-1	10042.2	3.64943	0.288126	0.000160819	19.36	4.31714	0.237	6.75996	-4.86945e-16	seq2
											seq2
RM2											seq2
B 5	Nama	46713.7	1.09991	0.727703	0.0372071	3.716	3.88829	0.5822	1.2417	-3.67921e-16	seq2
B 6	Nama	39090.1	3.1188	0.704455	0.0294423	7.786	3.90648	0.3247	1.32009	-3.44463e-16	seq2
B 37	Nama	39147.4	1.37067	0.617647	0.0254748	5.092	3.96397	0.5073	1.56214	0	seq2
B 38	Nama	25445.3	3.2583	0.545134	0.0489677	8.903	3.85607	0.2407	1.54749	0	seq2
B 71	Nama	120012	1.01234	1.72635	0.142665	1.772	4.05517	0.7289	0.984111	0	seq2
B 72	Nama	121831	1.41247	1.75039	0.192483	2.343	4.19624	0.6957	0.982352	0	seq2
B 106	Nama	47472	0.937795	0.738856	0.0942517	3.375	4.14457	0.6104	0.978961	0	seq2
B 107	Nama	69312.2	1.39908	1.08608	0.212012	3.412	4.23098	0.6095	0.966723	8.68595e-16	seq2
B 150	Nama	34939.9	0.755894	0.563346	0.0617826	3.542	4.06325	0.6038	1.21361	0	seq2
B 151	Nama	39272.3	1.22496	0.657142	0.0856045	4.521	4.60924	0.5401	1.49588	5.1527e-16	seq2
198	Nama	65919.4	0.829266	1.06504	0.166504	2.267	3.98224	0.6939	0.931394	-4.78927e-16	seq2
199	Nama	88192.9	0.546352	1.43596	1.13523	1.193	7.17757	0.7665	1.04596	0	seq2
242	Nama	49556.4	1.31915	0.883777	0.0547646	3.835	4.30541	0.5736	1.10495	0	seq2
243	Nama	92933.3	0.729664	1.56384	0.203815	1.422	4.36867	0.75	0.89667	0	seq2
287	Nama	35643.4	0.967605	0.656336	0.062694	3.787	3.94531	0.5759	1.15846	3.8866e-16	seq2
288	Nama	245620	0.73517	4.07515	0.585204	0.609	4.88366	0.8042	0.860917	-8.44994e-16	seq2
332	Nama	71179.2	1.09399	1.29309	0.119035	2.426	4.01102	0.6728	1.06175	0	seq2
333	Nama	179477	0.889902	3.18491	0.427777	0.8839	4.5713	0.778	0.936356	0	seq2
387	Nama	129617	0.876549	2.32387	0.463144	1.196	3.93848	0.7566	0.905833	-4.97913e-16	seq2
388	Nama	100940	0.842117	1.86611	0.205629	1.408	3.9557	0.7451	0.963362	0	seq2
454	Nama	50337	2.08419	1.02585	0.0956721	4.987	4.97664	0.5063	1.44244	-4.9491e-16	seq2
455	Nama	86173.2	1.78994	1.67771	0.24695	3.021	3.93053	0.6347	1.03121	-4.38262e-16	seq2
527	Nama	30957.2	0.639188	0.637311	0.159576	2.872	5.89993	0.6437	1.20409	0	seq2
528	Nama	134082	4.19356	2.79031	0.126825	3.856	4.7338	0.5642	1.94863	-3.85142e-16	seq2
598	Nama	33701.2	0.653188	0.691141	0.119932	2.783	4.28063	0.6563	1.05023	0	seq2
RM0
N01	NIST614	244618	0.67763	1.85795	0.971145	1.248	0.70836	0.8718	0.311169	0	seq3
N02	NIST614	341527	0.929014	2.56971	0.92514	1.246	0.359632	0.8722	0.276277	0	seq3
N33	NIST614	325560	0.828079	2.37957	0.850857	1.221	0.483895	0.8689	0.34131	0	seq3
N34	NIST614	311931	0.803317	2.28125	0.800627	1.229	0.765111	0.872	0.308879	0	seq3
N67	NIST614	349932	0.911428	2.56796	0.994949	1.229	0.500924	0.8711	0.229648	0	seq3
N68	NIST614	325524	0.863098	2.38854	0.921643	1.245	0.750924	0.8697	0.361871	-4.08565e-16	seq3
N102	NIST614	296542	0.811584	2.22826	0.932378	1.243	0.527662	0.8718	0.257692	4.08248e-16	seq3
N103	NIST614	302569	0.79752	2.2343	0.879535	1.241	0.955335	0.8693	0.442656	0	seq3
N194	NIST614	298708	0.81794	2.32066	0.917368	1.23	0.994126	0.8719	0.347889	3.21017e-16	seq3
N195	NIST614	283982	0.794655	2.207	0.890078	1.253	0.519385	0.8699	0.396027	0	seq3
N238	NIST614	274743	0.795683	2.21473	0.875526	1.247	0.609712	0.8724	0.288098	-3.1602e-16	seq3
N239	NIST614	299238	0.859699	2.39273	0.966965	1.248	0.47778	0.8722	0.348403	3.33481e-16	seq3
N283	NIST614	289939	0.848757	2.38302	0.938846	1.235	0.392707	0.8715	0.261564	0	seq3
N284	NIST614	282849	0.825573	2.33036	0.917515	1.228	0.632526	0.8716	0.407567	-2.15329e-16	seq3
N328	NIST614	249895	0.736942	2.10305	0.793375	1.216	0.939436	0.8698	0.439563	0	seq3
N329	NIST614	254905	0.758814	2.13959	0.877019	1.231	0.94904	0.8687	0.321459	0	seq3
N383	NIST614	270919	0.834155	2.33904	0.89925	1.239	0.64643	0.8704	0.303152	0	seq3
N384	NIST614	278308	0.886276	2.42892	0.963329	1.254	0.250556	0.8723	0.145876	0	seq3
N450	NIST614	265841	0.834368	2.35892	0.931436	1.239	0.967396	0.8716	0.409021	0	seq3
N451	NIST614	277896	0.891494	2.48565	1.01958	1.248	0.430642	0.8715	0.275207	2.34193e-16	seq3
N498	NIST614	255562	0.82307	2.34442	0.924347	1.238	0.663911	0.8685	0.339103	2.46569e-16	seq3
N499	NIST614	235870	0.777189	2.19152	0.80489	1.231	0.767973	0.8728	0.485703	-2.97641e-16	seq3
RM1
C03	WC-1	7893.03	2.58035	0.11863	0.000146724	23.14	2.58507	0.1006	1.83022	-3.75451e-16	seq3
C04	WC-1	7437.6	3.03706	0.129499	8.83067e-05	23.68	2.60279	0.08342	1.85097	3.68714e-16	seq3
C35	WC-1	8384.99	2.80735	0.127771	0.000145666	23.06	2.57868	0.09691	2.08551	3.30309e-16	seq3
C36	WC-1	6584.95	2.91103	0.119594	0.000156343	24.03	2.56439	0.07588	2.73892	0	seq3
C69	WC-1	6609.6	2.45358	0.10812	0.000176714	23.35	2.59171	0.08867	2.08032	-1.64734e-16	seq3
C70	WC-1	14857.4	3.28413	0.1757	0.00102561	22.33	3.38093	0.1429	5.23528	2.00717e-16	seq3
C104	WC-1	7598.72	3.14318	0.133302	9.73969e-05	23.58	2.58414	0.0809	1.75863	1.95439e-16	seq3
C105	WC-1	7469.89	2.86503	0.123982	0.000135706	23.71	2.58193	0.08928	2.43213	2.82878e-16	seq3
C196	WC-1	8687.59	3.16156	0.143484	6.77617e-05	22.98	2.57235	0.09504	1.77166	0	seq3
C197	WC-1	6051.9	2.52691	0.106627	0.000128277	24.17	2.59491	0.08583	2.04678	0	seq3
C240	WC-1	7339.52	2.54996	0.118702	0.000116535	22.94	2.62579	0.1021	2.08361	-1.62339e-16	seq3
C241	WC-1	6318.49	3.24081	0.129492	5.61267e-05	24.54	2.58556	0.07343	2.02727	3.38894e-16	seq3
C285	WC-1	7712.55	2.74946	0.126598	0.000126613	23.2	2.58777	0.1021	2.03549	0	seq3
C286	WC-1	8179.05	2.78064	0.131227	0.000127584	22.95	2.63659	0.1057	2.58586	2.60545e-16	seq3
C330	WC-1	7983.85	3.44531	0.147642	0.000145529	24.05	2.58131	0.08932	3.04669	-2.25872e-16	seq3
C331	WC-1	7405.61	3.46586	0.14528	0.000163916	24.08	2.59167	0.08321	2.16322	0	seq3
C385	WC-1	8229.83	3.68015	0.155858	8.03876e-05	24.24	2.5798	0.08918	1.63628	0	seq3
C386	WC-1	5915.18	3.0657	0.125608	0.000163961	24.26	2.5712	0.07844	2.09434	1.64937e-16	seq3
C452	WC-1	7516.77	2.73181	0.129648	0.000117939	23.01	2.59553	0.1107	1.97437	-1.73319e-16	seq3
C453	WC-1	5337.53	2.50377	0.107039	0.000165831	23.97	2.59555	0.08883	2.76926	1.23568e-16	seq3
C500	WC-1	6081.94	3.33681	0.136332	0.000134081	24.15	2.6085	0.07069	2.56574	-2.65415e-16	seq3
C501	WC-1	6613.89	3.53229	0.145534	0.000112208	24.4	2.56159	0.08051	1.99859	0	seq3
RM2
Z05	Ash 15-D	3017.08	1.75517	0.0172425	2.97429e-05	310.8	4.18202	0.7286	6.12944	2.77194e-16	seq3
Z05i	Ash 15-D	1267.7	1.65451	0.00726162	1.19006e-05	638.9	4.49878	0.6013	4.47971	0	seq3
Z06	Ash 15-D	41332.6	1.2856	0.226537	0.000252027	19.62	4.52365	0.8534	1.55636	5.04614e-16	seq3
Z37	Ash 15-D	60138	1.75369	0.331993	4.33089e-05	18.25	4.18084	0.8546	1.0268	0	seq3
Z38	Ash 15-D	4553.92	0.802309	0.0258791	2.33197e-05	106.9	3.79634	0.8296	3.09316	-1.51273e-16	seq3
Z71	Ash 15-D	7278.27	2.06189	0.0391691	3.00053e-06	181.9	4.83425	0.7987	2.45418	2.9945e-16	seq3
Z72	Ash 15-D	744.608	1.66643	0.00474431	-4.62743e-07	897.9	4.26893	0.523	5.36901	1.55006e-16	seq3
Z72i	Ash 15-D	1909.73	1.74791	0.0146698	1.33895e-06	484.7	5.42035	0.6704	3.97933	-4.94132e-16	seq3
Z106	Ash 15-D	5147.74	1.36487	0.0279404	8.73904e-06	167.2	8.78228	0.8012	2.9672	-5.45338e-16	seq3
Z107	Ash 15-D	13427.2	1.3763	0.0613228	0.000362606	99.57	3.44169	0.8305	2.00247	0	seq3
Z198	Ash 15-D	70840.8	1.49928	0.397886	0.000209946	12.86	3.54343	0.8618	1.20723	4.15256e-16	seq3
Z199	Ash 15-D	6281.67	1.46074	0.035922	5.17077e-05	134.3	3.64975	0.8177	2.65597	0	seq3
Z242	Ash 15-D	73721.9	0.973578	0.411052	0.000232616	8.159	12.1262	0.8597	0.966832	-2.42424e-15	seq3
Z243	Ash 15-D	1460.8	1.30246	0.0084403	1.47321e-05	443.4	9.87475	0.7088	4.61506	0	seq3
Z243i	Ash 15-D	5614.57	1.43479	0.0317881	5.42802e-05	147.3	4.99091	0.8146	3.50941	2.02837e-16	seq3
Z287	Ash 15-D	8949.89	1.61135	0.0503649	0.000307243	106.5	4.43692	0.8225	2.11682	0	seq3
Z288	Ash 15-D	10052.6	1.92602	0.0567445	4.51332e-05	112.1	10.6033	0.8186	2.18003	0	seq3
Z332	Ash 15-D	77185.7	0.894679	0.426688	0.000184979	7.413	11.3159	0.8606	0.877175	2.86336e-15	seq3
Z333	Ash 15-D	20508.6	1.50417	0.103167	4.3173e-06	56.81	4.20136	0.8278	2.02419	0	seq3
Z387	Ash 15-D	180.533	1.03509	0.00134046	0	1498	6.22854	0.3176	10.0591	0	seq3
Z388	Ash 15-D	10336.9	0.774859	0.0423704	0.000878742	101.4	5.16114	0.8146	3.3233	-2.07131e-16	seq3
Z454	Ash 15-D	12990.4	1.22789	0.056912	4.77349e-05	107.4	6.55392	0.8364	2.24006	-9.67967e-16	seq3
Z455	Ash 15-D	810.087	1.04828	0.00488742	4.78409e-06	601	4.81753	0.6387	5.87215	0	seq3
Z455i	Ash 15-D	1275.14	1.0616	0.00760351	3.63753e-05	418.5	4.14985	0.7017	4.79	0	seq3
Z502	Ash 15-D	214.236	1.25184	0.00158642	2.84308e-06	1492	5.5939	0.2863	9.46736	2.01251e-16	seq3
Z503	Ash 15-D	10142.8	1.61389	0.0561249	5.85973e-06	98.53	7.75505	0.8355	2.04123	-8.97726e-16	seq3

## Sheet: Samples
grain	name /	207Pba	Ub	Pbb	Thb	238Uc	±2s	207Pbc	±2s	rhod	Session
	sample	(cps)	(ppm)	(ppm)	U	206Pb	(%)	206Pb	(%)
A298	25	21643.3	1.78249	0.253318	0.0703826	17.3477	4.46536	0.536315	3.03653	0	seq1
A299	25	14947.1	1.44001	0.181757	0.0637826	18.5303	4.11741	0.508799	2.27886	0	seq1
A300	25	21787.2	1.93173	0.252704	0.0664913	18.3987	3.07244	0.506449	2.22694	0	seq1
A301	25	22205.1	1.87386	0.264431	0.0703688	17.4692	4.40843	0.52274	2.67007	-3.01824e-16	seq1
A302	25	23346.1	1.2313	0.245024	0.0643184	13.0617	3.37227	0.597653	2.2448	2.34656e-16	seq1
A303	25	21897.2	1.66613	0.251833	0.0666572	16.4679	1.84909	0.550811	1.37052	1.75237e-16	seq1
A304	25	11186.4	2.01303	0.151713	0.0605896	27.1593	2.00584	0.371405	1.52266	0	seq1
A305	25	41289.9	1.45234	0.437367	0.0612065	9.32513	2.60226	0.662641	1.66067	-4.1105e-16	seq1
A306	25	17256.7	1.69365	0.207536	0.0620746	19.2123	2.44967	0.503862	1.54174	2.35169e-16	seq1
A307	25	12361.1	1.24994	0.188017	0.0668272	19.1955	2.05134	0.506293	2.46205	-1.75859e-16	seq1
A308	25	36453.2	2.21719	0.412004	0.0606419	13.8016	4.07072	0.590719	2.14928	-4.06064e-16	seq1
A309	25	28669.2	1.94489	0.320819	0.070637	15.1715	4.1644	0.554163	2.66127	0	seq1
A310	25	16895.9	1.51314	0.191386	0.0632051	18.9787	3.03906	0.505719	2.70298	2.16246e-16	seq1
A65	19	16575.4	0.498574	0.294954	0.170479	4.72315	11.4212	0.760108	2.4817	0	seq2
A66	19	19097.4	0.43951	0.271971	0.176082	5.41367	7.59472	0.745437	1.55161	0	seq2
A73	19	164418	0.353315	2.08469	0.307874	0.645614	6.64957	0.810196	0.854821	0	seq2
A74	19	15485.6	0.330417	0.226755	0.194696	4.59107	6.67267	0.756578	1.60496	0	seq2
A75	19	69114.6	0.32797	0.823208	0.234215	1.65	13.659	0.80637	1.37329	1.51519e-15	seq2
A76	19	21682.5	0.402585	0.304994	0.224126	4.36589	5.90995	0.766842	2.29171	0	seq2
A77	19	21311.6	0.437199	0.28675	0.22619	5.29762	9.20044	0.766981	2.61181	0	seq2
A78	19	15805	0.582534	0.296387	0.149037	5.05175	12.2203	0.757292	3.55149	-6.54875e-16	seq2
A79	19	30611.3	0.417047	0.428675	0.198916	3.25082	12.3393	0.778329	1.53669	0	seq2
A80	19	20757.1	0.382517	0.296456	0.271531	4.30247	10.7529	0.779406	1.70734	0	seq2
A81	19	21679.2	0.515095	0.32769	0.192581	4.86458	12.8888	0.766772	2.29874	9.59285e-16	seq2
A82	19	29141.8	0.363641	0.500719	0.17647	2.02406	5.49988	0.78219	1.97113	-3.27712e-16	seq2
A83	19	11438.6	0.389487	0.17277	0.182374	6.97806	6.18853	0.74806	2.11447	5.43001e-16	seq2
A84	19	11030.3	0.349163	0.147267	0.190558	8.18498	6.33927	0.721158	2.78286	0	seq2
A85	19	19950.5	0.367772	0.286969	0.219279	4.24867	7.18116	0.765478	1.70767	5.79416e-16	seq2
A86	19	25451.7	0.454439	0.32209	0.187622	5.46249	9.09421	0.766106	1.53444	0	seq2
A87	19	68047.2	0.469782	0.797897	0.191592	2.65119	14.9407	0.795845	1.28523	1.48011e-15	seq2
A88	19	20689.6	0.447539	0.323542	0.298434	4.22842	13.6623	0.78014	1.59459	0	seq2
A89	19	21288.7	1.13069	0.334709	0.485761	10.3808	6.13755	0.708632	2.03335	0	seq2
A90	19	15248	0.506009	0.229933	0.209048	6.93388	9.80409	0.757716	2.17197	0	seq2
A91	19	19040.1	0.39584	0.282857	0.189261	4.54905	9.86638	0.761579	2.2412	-6.4266e-16	seq2
A93	19	23597.2	0.354393	0.328577	0.2655	3.70642	6.48605	0.761782	1.45759	7.51577e-16	seq2
A94	19	17053	0.333248	0.258421	0.190576	4.02998	9.05621	0.757851	1.80825	0	seq2
A95	19	41511	0.211349	0.539332	0.271144	1.46834	18.7765	0.800994	1.51516	1.99805e-15	seq2
A96	19	47925.5	0.465464	0.699613	0.17287	2.16199	9.21738	0.785547	1.12614	1.36905e-15	seq2
A97	19	17607.6	0.433994	0.277666	0.185427	4.62712	7.09558	0.764411	1.62565	-6.15993e-16	seq2
A98	19	28009.9	0.33167	0.397045	0.230467	2.79481	5.57478	0.785745	1.69748	3.7543e-16	seq2
A99	19	15296.8	0.358007	0.190923	0.182335	6.1448	5.65238	0.726273	4.9317	0	seq2
A100	19	25291.3	0.455314	0.41048	0.217626	3.28644	11.9827	0.782232	2.09927	1.12986e-15	seq2
A101	19	22117	0.338965	0.301849	0.210319	3.72154	10.2307	0.78342	5.01044	-2.77228e-16	seq2
A109	19	9226.81	0.373723	0.151815	0.203109	6.71213	6.25263	0.730127	5.47459	-2.07576e-16	seq2
A110	19	13203.2	0.287862	0.198594	0.259068	4.60363	4.89975	0.764126	4.49949	0	seq2
A111	19	19912.7	0.287998	0.269846	0.224421	3.92141	11.888	0.758469	2.41438	9.90233e-16	seq2
A112	19	8853.21	0.574546	0.158462	0.155753	9.45613	8.36547	0.698069	3.21616	-5.28192e-16	seq2
A113	19	10913	0.431784	0.170754	0.23924	7.63171	6.77209	0.729954	2.40291	0	seq2
A114	19	12281.1	0.388952	0.181411	0.198417	7.41427	5.53911	0.745168	3.28886	-1.95018e-16	seq2
A115	19	10321.3	0.45748	0.181023	0.18524	6.71447	9.3852	0.745538	3.36373	0	seq2
A116	19	14057.8	0.430118	0.205865	0.18408	6.48654	9.08188	0.755939	4.12554	-3.79284e-16	seq2
A120	19	41956.2	0.325266	0.587781	0.191516	1.965	10.3388	0.80011	1.2838	0	seq2
A121	19	28759.4	0.574232	0.43575	0.240377	4.26507	4.78509	0.784366	2.34871	0	seq2
A122	19	8112.69	0.444801	0.134578	0.191464	10.4081	6.30784	0.702449	3.26984	0	seq2
A123	19	152954	1.90688	2.49921	0.23749	2.27081	12.6299	0.797373	0.961171	2.34126e-15	seq2
A124	19	23996.9	0.415603	0.364081	0.199003	3.63275	5.57423	0.776594	1.45403	-4.38332e-16	seq2
A125	19	26732.3	0.383676	0.414322	0.213516	2.96613	18.36	0.77982	2.39063	1.29507e-15	seq2
A126	19	19780.9	0.673404	0.341156	0.113904	5.71979	14.1745	0.742364	2.09704	0	seq2
A127	19	11179.4	0.339653	0.171643	0.31634	6.02968	12.2688	0.757456	2.56532	9.03037e-16	seq2
A128	19	18788.2	0.460614	0.311082	0.213418	4.34857	12.2661	0.760245	2.42372	-9.56007e-16	seq2
A129	19	13195.5	0.359082	0.19241	0.199879	6.25521	6.89453	0.761936	2.07977	0	seq2
A130	19	16490	0.314644	0.240001	0.243472	4.44026	10.1903	0.758753	1.86013	-7.49704e-16	seq2
A131	19	20264	0.43731	0.284614	0.161374	5.33357	6.82878	0.766232	1.50871	6.89668e-16	seq2
A132	19	34079.1	0.398697	0.49851	0.22953	2.63175	10.4901	0.77908	3.46987	0	seq2
A133	4	9115.2	0.447251	0.131039	0.177338	10.5698	5.08399	0.682832	1.69117	0	seq2
A134	4	13961.2	0.472206	0.199514	0.194904	7.92471	6.25045	0.726703	1.4313	0	seq2
A135	4	14525.1	0.463744	0.219623	0.172708	6.64019	8.54732	0.739313	2.05316	0	seq2
A136	4	16218.6	0.587978	0.253064	0.15223	7.40962	6.8104	0.722227	2.10404	0	seq2
A137	4	13465.3	0.44803	0.196248	0.26671	7.97921	10.8934	0.724101	2.42742	-5.37416e-16	seq2
A138	4	43021.5	0.538835	0.629977	0.212676	2.91645	14.8477	0.778041	1.50409	0	seq2
A139	4	14057.6	0.422232	0.217414	0.187371	5.94757	7.06118	0.743391	1.30374	0	seq2
A140	4	9816.1	0.368914	0.157144	0.199238	7.26963	7.74007	0.734882	1.78469	0	seq2
A141	4	9507.99	0.481987	0.14946	0.163945	9.63377	5.37236	0.704904	2.02773	0	seq2
A142	4	13846	0.446792	0.191863	0.177712	8.35962	8.44868	0.726632	2.17765	7.72404e-16	seq2
A143	4	11825.7	0.537297	0.186872	0.165343	8.74785	6.1275	0.699196	2.27783	-5.09078e-16	seq2
A144	4	11350.9	0.385771	0.171001	0.207534	7.57129	6.93851	0.734655	2.17045	0	seq2
A145	4	12136.9	0.499832	0.181056	0.170162	9.0363	5.82515	0.707993	2.19559	5.55562e-16	seq2
A152	4	23760.2	0.497655	0.311	0.184495	6.83759	7.60026	0.749231	2.3101	-4.04698e-16	seq2
A153	4	13563.3	0.4674	0.197787	0.222077	7.75219	6.7284	0.725763	2.01468	0	seq2
A154	4	58855.6	0.470793	0.865816	0.183804	1.8905	10.3859	0.793531	1.29407	-1.05735e-15	seq2
A155	4	16574.8	0.479369	0.2375	0.160913	7.34831	6.66323	0.743625	1.84211	0	seq2
A156	4	22919.2	0.410422	0.322841	0.186834	4.55638	7.05554	0.757694	1.30617	0	seq2
A157	4	14651.9	0.46616	0.225516	0.167235	6.26518	6.16862	0.742324	2.17035	0	seq2
A158	4	97516.3	0.434674	1.58533	0.184822	0.856978	6.89743	0.802574	0.972374	0	seq2
A159	4	14243.2	0.610724	0.256853	0.251391	6.69894	7.64146	0.728402	2.88302	3.22527e-16	seq2
A160	4	44772.5	0.468526	0.663724	0.161189	2.42045	10.5905	0.779678	1.41154	0	seq2
A161	4	7586.39	0.413077	0.123238	0.205298	10.31	6.53272	0.691942	1.66346	0	seq2
A162	4	19939.8	0.475558	0.304403	0.210764	5.01875	5.14857	0.757618	1.60831	0	seq2
A163	4	10753.3	0.43854	0.177127	0.164968	7.77224	5.01076	0.71397	1.96303	-3.61186e-16	seq2
A164	4	13237.7	0.425288	0.20256	0.200617	6.78769	7.1139	0.739241	2.24779	0	seq2
A165	4	12925.1	0.574963	0.202289	0.150363	8.51397	7.1896	0.716649	1.50273	6.57663e-16	seq2
A166	4	34583.4	0.430466	0.497174	0.24259	3.12971	7.92077	0.776415	1.88595	4.75654e-16	seq2
A167	17	13581.9	1.21158	0.228152	0.0670994	13.843	4.91834	0.584751	1.95026	0	seq2
A168	17	10890.5	1.33244	0.185033	0.0475842	18.2154	5.46188	0.522892	3.40696	-3.81839e-16	seq2
A169	17	22684.5	3.13943	0.466545	0.0271648	15.5501	9.072	0.570416	2.5719	-6.09065e-16	seq2
A170	17	13526	1.30742	0.230931	0.0506666	14.951	7.63742	0.560386	3.47021	-2.68095e-16	seq2
A171	17	24431	1.29321	0.394333	0.0462824	9.444	7.04684	0.64041	2.79407	-3.60876e-16	seq2
A172	17	11313.8	1.34627	0.198025	0.0457923	17.8685	5.42307	0.535839	1.58113	0	seq2
A173	17	11231.5	1.23484	0.194781	0.0434724	16.3828	5.62382	0.540002	3.04389	-2.07539e-16	seq2
A174	17	13517.8	1.30821	0.229886	0.0448736	15.0291	4.92073	0.55864	2.35967	-3.05971e-16	seq2
A175	17	17388.1	1.2719	0.284867	0.0471843	12.3386	4.74672	0.603614	1.69459	0	seq2
A176	17	11361.9	1.31746	0.196266	0.0444195	16.6203	6.11766	0.538128	3.49796	0	seq2
A177	17	13226.2	1.29981	0.225864	0.046933	14.7946	8.82039	0.559515	3.79481	0	seq2
A178	17	8292.81	1.31923	0.148528	0.0479204	20.3429	4.6195	0.48263	2.49514	0	seq2
A179	17	11062.4	1.25338	0.182093	0.0468396	18.1424	4.86828	0.534589	2.23862	0	seq2
A180	17	9873.81	1.29628	0.171591	0.0466355	18.3335	6.22874	0.51407	3.66266	-3.11453e-16	seq2
A181	17	42957.8	1.27455	0.682517	0.0490212	5.70578	7.84543	0.708345	1.61606	5.60424e-16	seq2
A182	17	11415	1.28805	0.19753	0.0502633	16.365	4.71153	0.541545	1.91279	3.94213e-16	seq2
A183	17	13879.9	1.33965	0.236088	0.0468284	14.7036	4.77145	0.562762	1.53132	-4.86231e-16	seq2
A184	17	24820.1	0.580141	0.424797	0.21002	4.23901	24.838	0.741483	4.22475	0	seq2
A185	17	15848.6	1.1881	0.268768	0.0800401	12.1236	6.19432	0.61021	2.50079	0	seq2
A186	17	12742.9	1.17329	0.218782	0.0462788	13.9165	7.56067	0.567342	4.77062	3.9399e-16	seq2
A187	17	30602.5	1.30558	0.481491	0.0420814	8.32454	7.43415	0.683455	3.65726	2.61338e-16	seq2
A188	17	21830.5	1.35537	0.365138	0.0462603	10.7062	5.68034	0.650253	4.64404	0	seq2
A189	17	22812.5	1.08375	0.367654	0.0432047	8.66053	8.75769	0.682302	5.46685	0	seq2
A190	17	10758.2	1.1446	0.174895	0.0449295	17.1754	6.48789	0.558842	4.39043	0	seq2
A191	17	18542.8	1.22238	0.317018	0.0462349	10.5755	6.35819	0.62132	3.0296	0	seq2
A192	17	20324.6	1.29102	0.344392	0.0488078	10.4721	13.1834	0.633581	4.03759	0	seq2
A193	17	15026.2	1.14946	0.244513	0.0461469	12.7157	5.33133	0.59899	2.05637	0	seq2
A200	17	51923.1	0.544065	0.91434	0.432992	1.83921	22.1658	0.788793	3.40724	0	seq2
A201	17	14482.8	1.34317	0.253469	0.0435428	13.1016	6.51566	0.594619	4.10811	-2.65455e-16	seq2
A202	17	15186.3	1.41047	0.257533	0.044124	14.6983	5.7428	0.559938	3.66412	0	seq2
A203	17	31603.1	0.648513	0.583252	0.0995066	3.20098	17.5088	0.747418	3.18223	0	seq2
A204	17	13384	1.15903	0.223172	0.0670369	14.3091	4.58263	0.560833	3.10758	0	seq2
A205	17	13044.2	1.15275	0.218278	0.0496335	14.2764	6.64549	0.600255	2.87803	-3.71508e-16	seq2
A206	17	11449.3	1.12967	0.203415	0.0427101	14.5181	6.06233	0.553342	2.76879	0	seq2
A207	17	10215.5	1.24863	0.183662	0.0494419	17.1893	5.73959	0.520215	2.95316	4.19201e-16	seq2
A208	17	13937.4	1.17303	0.232616	0.0465642	13.0254	5.49308	0.614173	3.11519	0	seq2
A209	17	16485.3	1.32536	0.345523	0.0404746	12.5901	5.09458	0.61305	2.04534	3.40947e-16	seq2
A210	17	21688	1.28329	0.348387	0.0428353	11.069	7.17743	0.646156	3.01064	3.28823e-16	seq2
A211	17	21461.6	1.13817	0.326532	0.0449955	11.0817	7.72884	0.643604	2.83977	3.23737e-16	seq2
A212	17	10382.6	1.2464	0.191331	0.0487829	15.823	7.31454	0.527496	3.71901	0	seq2
A213	17	9171.31	1.11124	0.160462	0.0531919	17.043	4.74326	0.534352	2.53136	0	seq2
A214	17	20486	1.12075	0.33321	0.0831164	10.3863	6.14334	0.654073	2.2739	0	seq2
A215	17	10486.8	1.20156	0.191937	0.0488977	16.4659	4.53181	0.552796	2.26915	0	seq2
A216	17	17809.7	0.946721	0.302931	0.0605214	9.01062	11.8587	0.659821	3.02267	0	seq2
A217	17	19545.9	1.06088	0.324615	0.0474822	9.54403	8.17124	0.657649	2.90805	0	seq2
A218	17	18565.3	1.02709	0.319302	0.0594378	9.20139	10.9298	0.670058	3.46216	3.75544e-16	seq2
A219	17	5478.57	0.725491	0.095206	0.0908833	20.8592	7.08405	0.485288	6.69597	2.99588e-16	seq2
A220	17	7753.28	1.02678	0.148213	0.111312	16.8681	8.55904	0.507772	4.77812	0	seq2
A221	17	5954.38	0.817508	0.111342	0.0913593	17.8479	5.56033	0.50922	3.30881	-1.93102e-16	seq2
A222	17	6355.58	0.711885	0.109936	0.111564	16.6894	4.52627	0.539911	2.65343	0	seq2
A223	17	6529.81	0.942015	0.123692	0.0931125	18.1471	9.61645	0.487406	7.95964	3.71315e-16	seq2
A224	17	3181.72	0.56274	0.058822	0.12701	22.7231	5.2705	0.460001	4.21222	1.60028e-16	seq2
A225	17	4957.45	0.490774	0.0885234	0.136566	14.4814	10.8083	0.551863	4.916	2.67455e-16	seq2
A226	17	4823.49	0.551599	0.0811238	0.126159	18.3065	6.43558	0.540899	4.37868	0	seq2
A227	18	2831.22	0.548206	0.0590476	0.119573	22.1204	5.2576	0.479264	2.69468	2.50764e-16	seq2
A228	18	5696	0.628616	0.106699	0.122099	15.0601	8.87836	0.557448	3.25298	0	seq2
A229	18	12886.8	0.641724	0.206526	0.106631	9.50197	8.93335	0.650599	2.1765	-7.30882e-16	seq2
A230	18	4612.55	0.731075	0.0875442	0.108868	19.507	10.0556	0.491214	5.62532	-2.51227e-16	seq2
A231	18	6200.18	0.511522	0.106673	0.145515	12.363	11.1662	0.608	4.56326	-2.78894e-16	seq2
A232	18	10830.9	0.870903	0.222514	0.110426	9.54721	14.0192	0.660755	1.98348	0	seq2
A233	18	9499.98	0.604017	0.162105	0.122643	10.7447	7.85391	0.662324	2.53349	-3.57097e-16	seq2
A234	18	14046.3	0.520888	0.221989	0.113513	7.52657	5.13873	0.700779	1.39016	0	seq2
A235	18	14003.7	0.631696	0.232116	0.103515	8.41051	8.9379	0.695962	2.28467	0	seq2
A236	18	15157.2	0.560633	0.294361	0.104672	5.03093	7.96639	0.719159	1.87379	0	seq2
A237	18	11882	0.58666	0.194052	0.103966	9.41218	5.10783	0.666423	1.93674	0	seq2
A244	18	13412.5	0.571369	0.225013	0.103484	7.73749	8.72134	0.701281	2.7953	0	seq2
A245	18	12118.4	0.533016	0.196101	0.107819	8.41692	7.49801	0.697584	2.47951	0	seq2
A246	18	8906.32	0.559959	0.152501	0.113441	11.0316	5.47015	0.649245	2.45018	0	seq2
A247	18	17361.3	0.646805	0.321387	0.0885231	5.70124	14.3552	0.714072	2.55691	0	seq2
A248	18	12339	0.536953	0.194502	0.111434	8.7737	10.247	0.68139	2.8461	0	seq2
A249	18	10789.2	0.501705	0.178952	0.107337	8.37129	7.88491	0.68643	2.97592	0	seq2
A250	18	6549.38	0.517799	0.108252	0.112938	13.7886	6.70819	0.611897	4.03836	0	seq2
A251	18	7249.44	0.537723	0.13074	0.110954	11.4836	6.18001	0.617151	3.19489	3.5987e-16	seq2
A252	18	9606.02	0.645609	0.165496	0.115659	11.385	6.03144	0.64848	2.42814	0	seq2
A253	18	8721.22	0.55425	0.161971	0.119008	10.2985	6.34032	0.642815	2.59555	-4.31767e-16	seq2
A254	18	16429.8	0.534781	0.273782	0.121302	6.43674	14.6855	0.699195	3.1015	-6.24005e-16	seq2
A255	18	11022.6	0.532389	0.213772	0.127748	11.6752	8.75289	0.644302	3.89172	0	seq2
A256	18	4777.56	0.504742	0.0846122	0.135754	15.9523	7.34503	0.551888	4.26517	0	seq2
A257	18	9300.23	0.928682	0.173768	0.0900975	14.3683	7.23755	0.582637	3.11038	0	seq2
A258	18	7299.32	0.567674	0.130223	0.118857	11.3866	5.33083	0.616823	3.95236	1.6862e-16	seq2
A259	18	7360.35	0.593316	0.13146	0.107405	12.4447	7.79789	0.613193	4.7805	0	seq2
A260	18	11019.1	0.534934	0.18034	0.107685	9.62027	9.18472	0.672646	2.96817	0	seq2
A261	18	7482.41	0.525658	0.131958	0.109266	11.2102	7.21301	0.630905	2.73789	0	seq2
A262	18	9704.14	0.529419	0.154762	0.109807	10.8953	9.70278	0.65438	3.0248	0	seq2
A263	18	20442.8	0.617122	0.353053	0.115591	5.24314	19.0436	0.71727	2.59378	0	seq2
A264	18	15215.6	0.53193	0.263851	0.0997084	6.31528	5.43554	0.723025	2.1821	-2.99532e-16	seq2
A265	18	15175.6	0.477598	0.260923	0.110472	5.70112	5.79757	0.728992	1.54586	0	seq2
A266	18	17039.7	0.520416	0.30024	0.114428	5.47054	5.60192	0.730473	2.43312	-2.60651e-16	seq2
A267	18	11681.6	0.484823	0.205893	0.116323	7.02213	5.31843	0.710961	2.0079	0	seq2
A268	18	20040	0.599735	0.346299	0.104587	5.4413	9.27831	0.722412	1.62623	9.41823e-16	seq2
A269	18	16012.7	0.72554	0.282331	0.0912852	7.79555	8.97101	0.703283	2.18063	0	seq2
A270	18	9005.44	0.486399	0.155194	0.109328	9.28365	5.69513	0.673389	2.55988	4.8738e-16	seq2
A289	20	2964.95	0.840789	0.0637145	0.0252068	27.0285	4.49179	0.376268	4.62488	0	seq2
A290	20	5009.4	0.867766	0.0898544	0.0255226	23.9727	7.54493	0.448771	4.27817	2.20129e-16	seq2
A291	20	1982.39	0.863151	0.0448544	0.0243102	33.2712	4.71815	0.289787	5.99769	1.25546e-16	seq2
A292	20	1962.41	0.902425	0.0463988	0.0251717	33.3359	4.37721	0.265074	4.11092	0	seq2
A293	20	2077.12	0.907539	0.0495486	0.0263035	31.3518	4.65404	0.291191	4.27018	-1.78766e-16	seq2
A294	20	5199.35	0.859244	0.0959893	0.024967	24.3577	6.82895	0.431668	8.24511	0	seq2
A295	20	21045.8	0.906515	0.409565	0.0232654	5.67381	5.95587	0.704428	2.44221	-4.88498e-16	seq2
A296	20	2738.15	0.842791	0.0603321	0.0249552	27.6648	5.01442	0.344224	3.76701	0	seq2
A297	20	3177.5	0.87039	0.0791489	0.0265704	26.1022	4.5514	0.383798	6.7382	0	seq2
A298	20	13409.3	0.850017	0.205247	0.0254261	14.7114	10.9425	0.574962	6.87249	0	seq2
A299	20	8737.14	0.875758	0.15236	0.0287412	15.3088	5.91462	0.570418	4.14726	-2.89669e-16	seq2
A300	20	2142.48	0.861649	0.0484763	0.0262177	32.1416	4.1832	0.289482	3.63597	2.33577e-16	seq2
A301	20	3835.76	0.86215	0.0785314	0.0249286	25.3239	4.9295	0.415006	6.50128	1.10856e-16	seq2
A302	20	4998.67	0.913452	0.100233	0.0360245	24.542	5.9339	0.429965	2.93222	-4.0837e-16	seq2
A303	20	6124.51	0.913196	0.0717675	0.0284598	28.8676	4.94076	0.335313	4.39931	-3.26898e-16	seq2
A305	20	2821.47	0.905838	0.0622039	0.0255181	28.5847	5.26594	0.335723	5.29124	0	seq2
A306	20	2501.65	0.885123	0.0550706	0.0238151	31.1805	4.76793	0.3186	3.12135	0	seq2
A307	20	3461.42	0.894708	0.0728248	0.0240142	26.7409	5.22921	0.362937	5.42877	2.50295e-16	seq2
A308	20	2986.9	0.877334	0.0675134	0.0309683	26.4633	4.64968	0.369326	3.6335	2.10287e-16	seq2
A309	20	2589.79	0.868409	0.055147	0.024207	26.7321	5.12118	0.346677	2.79552	0	seq2
A310	20	4122.85	0.874811	0.0724939	0.0238549	27.2825	4.7298	0.378669	4.91727	-1.52754e-16	seq2
A311	20	2539.36	0.875585	0.0582038	0.0257792	27.651	4.40356	0.337412	3.69138	0	seq2
A312	20	2170.95	0.892507	0.0531752	0.0236086	30.2094	4.26478	0.320493	3.26972	-2.54773e-16	seq2
A313	20	1923.36	0.908898	0.0465411	0.024419	34.5474	4.78005	0.276815	2.75309	0	seq2
A314	20	3742.77	0.899598	0.0819903	0.0269897	23.3296	4.58524	0.406397	3.82179	0	seq2
A315	20	8948.68	0.89174	0.154533	0.0262662	16.724	5.19545	0.537499	2.79784	-2.44408e-16	seq2
A316	20	3514.47	0.924659	0.0742598	0.0260093	26.8652	5.05435	0.382176	3.83163	1.83447e-16	seq2
A317	20	3989.94	0.936989	0.083047	0.0299526	24.3547	6.25385	0.406428	4.9558	-2.29261e-16	seq2
A318	20	5306.42	0.88491	0.100579	0.0254999	22.0107	5.03722	0.455725	5.95487	0	seq2
A319	20	2441.59	0.84503	0.0487901	0.0276614	29.3668	4.58107	0.318041	4.5379	-1.70898e-16	seq2
A320	20	4709.32	0.868681	0.0999159	0.0255854	20.3739	6.13472	0.453745	5.71446	0	seq2
A321	20	5479.47	0.840416	0.104996	0.0258291	19.7356	4.96981	0.483432	4.11203	1.73846e-16	seq2
A322	20	2932.86	0.840143	0.0650377	0.0277288	26.5088	4.4458	0.363938	4.14025	-1.93012e-16	seq2
A323	20	3702.39	0.8169	0.0803519	0.0268976	22.7941	4.4946	0.43928	3.20935	0	seq2
A324	20	3247.19	0.783392	0.0699925	0.0295306	22.9654	4.33408	0.405046	3.74737	2.18744e-16	seq2
A325	20	6530.69	0.910815	0.127379	0.0230844	17.1416	5.56845	0.523327	4.48009	1.4241e-16	seq2
A326	20	3478.21	0.861304	0.0727638	0.0296397	25.2585	5.52759	0.381855	3.6866	0	seq2
A327	20	4063.97	0.842378	0.08788	0.0282453	21.3205	4.93554	0.458432	4.50782	1.59683e-16	seq2
A334	20	6500.29	0.811586	0.117588	0.0272985	18.2425	5.78236	0.5028	10.9137	0	seq2
A335	20	3388.14	0.827304	0.0759867	0.0249321	23.9168	5.29722	0.397816	4.37959	3.06273e-16	seq2
A336	20	3841.18	0.847764	0.0819741	0.0277954	23.0586	5.21999	0.42461	4.70374	-1.44693e-16	seq2
A337	20	3826.84	0.82936	0.0771147	0.0251767	24.7158	5.55258	0.415391	4.87485	-1.31251e-16	seq2
A338	20	5165.38	0.863688	0.101291	0.0253652	20.2139	5.07615	0.483728	4.12713	-1.69581e-16	seq2
A339	20	93918.7	0.816197	1.62864	0.0274911	1.61453	4.87143	0.776496	0.864694	0	seq2
A340	23	20930.6	1.24692	0.399505	0.0366686	9.37167	8.11577	0.669035	2.34735	7.45957e-16	seq2
A341	23	45812.8	0.916354	0.937905	0.181439	2.794	9.41051	0.768605	2.16953	0	seq2
A342	23	12332.7	1.10136	0.239347	0.0369015	12.5414	5.2057	0.610926	2.11645	3.22458e-16	seq2
A343	23	41532.4	1.13924	0.742308	0.164876	4.92523	8.05133	0.748929	2.11413	8.34873e-16	seq2
A344	23	47112	0.944002	0.865152	0.204647	3.46864	7.51165	0.763352	1.64317	0	seq2
A345	23	25293.1	1.09906	0.466889	0.0932933	7.2483	7.79544	0.713435	2.34018	0	seq2
A346	23	36154.1	0.984954	0.801891	0.166226	3.26457	7.22497	0.753033	1.68566	-5.83422e-16	seq2
A347	23	19103.2	1.01406	0.347513	0.0720223	9.00072	6.00854	0.687107	1.88356	6.27831e-16	seq2
A348	23	22918.2	0.951663	0.428839	0.100558	6.7023	6.81916	0.707963	2.95765	0	seq2
A349	23	20487	1.17606	0.385389	0.0384987	8.97053	6.49732	0.675306	2.15821	0	seq2
A350	23	13719.9	1.19458	0.2648	0.0400061	12.3644	6.9038	0.61848	2.45582	4.19088e-16	seq2
A351	23	61558.8	1.13	1.04606	0.0497418	3.71181	5.98696	0.763192	1.43619	0	seq2
A352	23	19463.2	1.06248	0.359969	0.0837855	8.57447	6.12916	0.690337	2.20768	-5.25114e-16	seq2
A353	23	14364	0.936207	0.271973	0.063702	10.0822	7.87794	0.642149	2.51546	3.58559e-16	seq2
A354	23	14163.7	1.19901	0.270696	0.0347736	12.4063	9.08353	0.609118	3.33026	0	seq2
A355	23	43795.8	1.0312	0.790219	0.0504323	4.23747	7.76938	0.75117	1.9388	0	seq2
A356	23	13952.5	1.08167	0.263818	0.0352561	11.5232	7.2659	0.631589	3.34379	0	seq2
A357	23	26925.3	1.05547	0.494545	0.0443189	6.49559	7.91899	0.714824	2.25591	3.9774e-16	seq2
A358	23	16356.5	1.12167	0.317788	0.0351221	10.0899	6.16922	0.655728	2.67563	4.30461e-16	seq2
A359	23	20477.8	1.04083	0.383235	0.0773975	8.07261	7.08453	0.702699	2.62497	-3.82081e-16	seq2
A360	23	26503.8	1.1605	0.481776	0.0656014	7.39831	5.24124	0.710114	1.6862	0	seq2
A361	23	37282.4	0.956393	0.672539	0.166588	4.59244	7.80253	0.752398	2.18276	4.17203e-16	seq2
A362	23	49869.5	1.15037	0.888286	0.03903	4.25179	7.45145	0.755742	1.43624	0	seq2
A363	23	78668.6	1.16299	1.41466	0.0345677	2.67839	7.41711	0.779609	1.32993	7.20323e-16	seq2
A364	23	29303.6	1.13099	0.510818	0.0516986	7.15263	7.44741	0.711369	2.24946	-4.24137e-16	seq2
A365	23	207580	1.14195	3.65795	0.0381961	1.06244	14.1384	0.805522	0.98178	0	seq2
A366	23	38316	0.978139	0.698244	0.132288	4.44447	6.64547	0.755384	1.7799	0	seq2
A367	23	95705	1.1522	2.62972	0.329724	1.04882	7.78352	0.805153	1.02399	0	seq2
A368	23	87145.2	0.84229	1.96412	0.511425	1.15722	14.5703	0.805388	1.18765	0	seq2
A369	23	91484.1	0.975308	1.62696	0.117467	2.00005	17.0875	0.792711	1.12222	2.96432e-15	seq2
A370	23	41849.1	0.986206	0.777851	0.129091	3.94089	12.5426	0.757952	1.87559	0	seq2
A371	23	57964.6	0.766439	1.25626	0.45371	1.6893	18.5723	0.795481	1.6247	0	seq2
A372	23	35644.3	0.990742	0.681274	0.13306	4.52135	10.3432	0.744854	1.95323	-7.03418e-16	seq2
A373	23	20923	1.001	0.388741	0.0749331	7.67442	14.7857	0.685489	4.40603	0	seq2
A374	23	15522.7	1.06393	0.310231	0.0771246	10.0108	9.67242	0.646323	4.06156	0	seq2
A375	23	32476.2	1.04903	0.572617	0.114528	6.04135	8.62966	0.734015	3.50878	0	seq2
A376	23	50682.6	0.858625	0.928968	0.240572	2.97751	8.20139	0.767101	1.24883	0	seq2
A181	22	29092.8	0.37741	0.177223	0.322289	6.52817	6.07918	0.719022	1.74353	-6.70374e-16	seq3
A182	22	16951	0.393302	0.10735	0.332777	10.625	8.08902	0.667556	2.36596	0	seq3
A183	22	17789.6	0.381926	0.111692	0.378489	9.9313	5.0438	0.673146	1.53253	0	seq3
A184	22	43295.4	0.339223	0.245955	0.350995	4.72954	5.22837	0.755177	1.40624	4.8321e-16	seq3
A185	22	20984.7	0.345788	0.132195	0.370285	7.89947	6.90779	0.699159	1.97948	0	seq3
A186	22	20096.7	0.341209	0.114518	0.348956	9.74254	4.36457	0.679849	1.27591	0	seq3
A187	22	20778.8	0.36564	0.129545	0.342072	8.38097	6.21065	0.699189	1.59064	0	seq3
A188	22	31992.7	0.347173	0.201668	0.348177	5.17347	4.61931	0.738621	1.33708	-5.75208e-16	seq3
A189	22	18990.3	0.343107	0.115918	0.354194	8.95976	3.91023	0.685894	1.49402	-3.04069e-16	seq3
A190	22	19704.6	0.335841	0.118817	0.335176	8.76961	3.27232	0.688595	1.10985	0	seq3
A191	22	27639.2	0.334426	0.14611	0.346688	8.37643	6.83822	0.696451	2.58219	0	seq3
A192	22	43654.1	0.362663	0.241104	0.384535	5.28324	5.20579	0.744575	0.908182	0	seq3
A193	22	23935.5	0.34909	0.134091	0.339425	8.81902	4.44405	0.699728	1.81501	0	seq3
A200	22	14459.5	0.367365	0.0929601	0.3315	11.1748	4.90488	0.656096	1.3606	5.32355e-16	seq3
A201	22	33860.5	0.338472	0.2034	0.355296	5.2582	4.93238	0.738598	1.03368	0	seq3
A202	22	21118.8	0.379578	0.133322	0.358441	8.53259	5.42926	0.700161	1.23335	0	seq3
A203	22	16575.9	0.362005	0.104686	0.34706	9.96455	4.47742	0.673001	1.78021	0	seq3
A204	22	25998.6	0.312072	0.155651	0.33268	6.39769	5.97049	0.729529	1.56933	0	seq3
A205	22	42742.4	0.323548	0.260711	0.33906	3.98069	4.86237	0.756512	1.41233	-5.1734e-16	seq3
A206	22	33461.9	0.332144	0.197581	0.379251	5.44862	6.81595	0.741983	1.62135	-6.42962e-16	seq3
A207	22	40273	0.348048	0.248234	0.365823	4.44068	5.32497	0.75713	1.28331	0	seq3
A208	22	80953.9	0.356973	0.502763	0.339366	2.27819	4.6519	0.779474	0.80195	0	seq3
A209	22	81501.2	0.358691	0.493593	0.352401	2.40034	6.18565	0.785462	0.788227	0	seq3
A210	22	46497.1	0.399962	0.252089	0.361952	5.81503	5.7758	0.743476	1.58653	0	seq3
A211	22	16496.2	0.339919	0.104809	0.366425	9.47581	5.73313	0.677285	1.50693	8.22442e-16	seq3
A211i	22	58842.7	0.397227	0.368796	0.366678	3.4286	5.57649	0.769716	1.79657	0	seq3
A212	22	25775.6	0.341033	0.159327	0.364355	6.70089	4.70196	0.721331	1.41609	0	seq3
A213	22	25085.4	0.381065	0.163204	0.411245	6.88416	6.0771	0.724783	1.22587	9.53781e-16	seq3
A214	22	20375.9	0.382041	0.129779	0.331912	8.90935	5.85998	0.703908	1.21934	0	seq3
A215	22	21097.2	0.383344	0.132972	0.340714	8.62106	5.25663	0.693207	1.31518	-5.13886e-16	seq3
A216	22	17865.5	0.350543	0.113412	0.346851	9.0808	4.95652	0.685944	1.05138	0	seq3
A217	22	50184.7	0.336451	0.305563	0.349658	3.53094	5.92074	0.774469	0.811224	0	seq3
A218	22	42800.2	0.38368	0.259161	0.456086	4.87306	6.27624	0.751697	1.05174	0	seq3
A219	22	28004.3	0.322925	0.168281	0.366498	6.2208	5.82268	0.734691	1.19611	0	seq3
A220	22	16408.2	0.361542	0.105117	0.364455	10.0813	3.87094	0.668901	1.60754	-2.85464e-16	seq3
A221	22	31279.1	0.330407	0.192993	0.37076	5.31138	3.42025	0.741927	1.03722	5.00729e-16	seq3
A222	22	104936	0.38332	0.605583	0.369555	2.21405	7.01803	0.785505	1.0641	-9.51467e-16	seq3
A223	22	31645.1	0.36568	0.199396	0.368399	5.71732	7.13231	0.734007	1.20081	0	seq3
A224	22	50924	0.319099	0.327751	0.361927	2.99845	5.35551	0.776085	0.866439	0	seq3
A225	22	44168.8	0.327033	0.272221	0.341593	3.86229	6.79934	0.762347	1.38576	-7.54112e-16	seq3
A226	22	61121.1	0.330954	0.337537	0.343484	3.57484	5.74432	0.770062	1.42441	0	seq3
A227	22	42006	0.386963	0.263136	0.371193	4.60725	5.07853	0.753662	1.10478	0	seq3
A228	22	21327	0.303834	0.130776	0.347908	7.36948	4.87038	0.710952	1.09462	0	seq3
A229	22	32865	0.323217	0.199402	0.354208	5.25838	6.51854	0.74943	1.13603	0	seq3
A230	22	70871.1	0.336827	0.432145	0.348121	2.57011	8.29914	0.780233	1.26358	0	seq3
A231	22	45498.9	0.33733	0.285867	0.365739	3.70429	5.24039	0.757554	1.0643	0	seq3
A232	22	39222.5	0.352298	0.242688	0.36869	4.61188	5.57558	0.74921	0.998127	6.38388e-16	seq3
A233	22	27818.6	0.348127	0.170873	0.368273	6.43765	6.44343	0.730522	1.48169	0	seq3
A234	22	24575.4	0.311414	0.153501	0.379669	6.34042	4.6254	0.728807	1.0608	0	seq3
A235	22	68324.2	0.335823	0.432148	0.349341	2.48081	8.22151	0.776572	0.944662	1.82975e-15	seq3
A236	22	29001.7	0.334241	0.167723	0.373644	6.63129	7.97221	0.725677	0.918676	-1.94035e-15	seq3
A237	22	23892.8	0.34889	0.154292	0.368591	6.85298	8.14568	0.715274	1.79203	0	seq3
A244	12	25031.1	0.403853	0.15889	0.187374	7.65969	6.03766	0.707013	1.04319	0	seq3
A245	12	37387.5	0.591458	0.248023	0.20213	7.00215	8.30775	0.729096	1.61139	0	seq3
A246	12	25147.4	0.424386	0.156501	0.184026	8.28799	5.73329	0.700572	2.15836	5.74198e-16	seq3
A247	12	36060.2	0.441239	0.232311	0.178902	5.78438	5.65994	0.735031	1.34548	0	seq3
A248	12	36365.5	0.405671	0.224758	0.184512	5.77295	7.54912	0.738012	1.12186	0	seq3
A249	12	30099.5	0.377081	0.182929	0.242828	6.61871	7.39479	0.72716	1.57488	0	seq3
A250	12	24394	0.45559	0.157698	0.19495	8.54927	4.29509	0.696496	1.73705	0	seq3
A250i	12	65825.5	0.399461	0.418311	0.18478	3.02868	12.535	0.772973	1.45278	-1.56073e-15	seq3
A251	12	51528.9	0.418789	0.319332	0.181016	4.23551	6.43355	0.762481	1.03608	0	seq3
A252	12	32433	0.360767	0.194479	0.252488	6.20144	8.77855	0.738344	1.14885	0	seq3
A253	12	34381.6	0.377325	0.20752	0.187989	5.95836	6.80879	0.738441	1.22363	0	seq3
A254	12	89228.9	0.391072	0.527613	0.188901	2.55741	8.0457	0.778617	1.14163	1.54714e-15	seq3
A255	12	28140.6	0.394329	0.182403	0.167744	6.55549	5.32895	0.715465	1.59485	4.18021e-16	seq3
A256	12	71534	0.505681	0.458149	0.181827	3.48766	4.89294	0.772569	0.883922	8.2144e-16	seq3
A257	12	38016.7	0.455787	0.242398	0.216009	5.85871	5.94581	0.746456	1.38214	0	seq3
A258	12	51638.5	0.366088	0.3269	0.220992	3.53921	5.01191	0.763086	0.916022	0	seq3
A259	12	38525.3	0.388441	0.250838	0.204499	4.75726	4.92123	0.755057	1.25871	5.73535e-16	seq3
A260	12	21614.3	0.433093	0.146108	0.256259	8.53429	6.32286	0.701904	1.20525	0	seq3
A261	12	118733	0.345597	0.674734	0.229889	1.91756	7.3318	0.792065	0.808144	0	seq3
A262	12	33050.2	0.306761	0.2008	0.302316	5.09454	5.07506	0.759349	1.10778	6.31924e-16	seq3
A263	12	25617.3	0.351071	0.163905	0.22371	6.56747	5.04966	0.725093	1.47633	-4.76555e-16	seq3
A264	12	78687.5	0.377947	0.497132	0.222402	2.48198	7.17276	0.790194	0.84221	0	seq3
A265	12	20287.1	0.416747	0.132102	0.272715	9.36415	4.48981	0.690231	1.21831	-6.49494e-16	seq3
A266	12	26825.1	0.409807	0.168073	0.216549	7.61835	4.41362	0.713446	1.62699	0	seq3
A267	12	32676.4	0.445632	0.205681	0.208284	6.77829	7.48941	0.725473	1.58132	0	seq3
A268	12	62461.6	0.392969	0.394406	0.196391	3.21772	3.60765	0.773566	0.884857	0	seq3
A269	12	42967.9	0.484186	0.277706	0.169301	5.4478	6.05651	0.744459	0.921636	-1.27294e-15	seq3
A270	12	30791.6	0.389336	0.200002	0.1681	5.93698	5.96893	0.727359	1.38013	8.62529e-16	seq3
A271	12	92149.3	0.374963	0.577311	0.200162	2.15725	5.44442	0.789124	0.672697	0	seq3
A272	12	90951.2	0.416522	0.590024	0.164445	2.23562	8.20427	0.79359	0.64656	0	seq3
A273	12	61279.6	0.384526	0.393511	0.198682	3.11115	5.20593	0.776419	0.818155	0	seq3
A274	12	20183.4	0.410745	0.128555	0.173845	9.69319	3.94441	0.68704	1.4185	0	seq3
A275	12	45145	0.427968	0.270834	0.195659	5.29135	13.131	0.744021	1.90387	-1.13689e-15	seq3
A276	12	28158.8	0.409796	0.178574	0.18089	7.24121	6.74896	0.712458	1.61597	0	seq3
A277	12	20227.4	0.438113	0.133085	0.221295	9.59805	5.42812	0.680179	1.35361	0	seq3
A278	12	25410	0.419594	0.166403	0.204278	7.44923	6.00172	0.712413	1.05514	0	seq3
A279	12	24640.2	0.433115	0.1593	0.178189	8.15623	5.31729	0.704176	1.06936	6.24809e-16	seq3
A280	12	25462.3	0.395557	0.157785	0.179286	8.05284	6.73719	0.709785	1.7475	6.03523e-16	seq3
A281	12	70082.3	0.436044	0.43701	0.198906	3.29322	14.9525	0.775295	1.19897	0	seq3
A282	12	24696.2	0.364097	0.155257	0.180755	7.38401	7.03562	0.713399	1.68819	0	seq3
A289	12	78002.5	0.412303	0.48024	0.167542	2.91319	7.37894	0.780368	1.06321	0	seq3
A290	12	24072.5	0.404864	0.157729	0.188399	7.70641	6.76624	0.697806	1.7877	0	seq3
A291	12	32276.8	0.440473	0.19731	0.167324	7.29629	7.71822	0.720891	1.75197	0	seq3
A292	12	29502.8	0.399047	0.191596	0.17891	6.39678	4.02299	0.716366	1.2969	6.80931e-16	seq3
A293	12	35080.7	0.397035	0.221144	0.169491	5.76382	10.0666	0.742729	1.58176	0	seq3
A294	12	45965.6	0.431713	0.291044	0.18421	4.81273	12.3662	0.755292	1.42483	0	seq3
A295	12	43440.1	0.425002	0.27268	0.213549	5.0789	10.5542	0.738589	1.66687	0	seq3
A296	12	24488.1	0.393846	0.159719	0.188918	7.39878	6.55017	0.69937	1.42273	0	seq3
A297	12	45610.8	0.381233	0.292135	0.182809	4.16143	6.73032	0.754337	1.21004	0	seq3
A298	12	28228.3	0.386054	0.18467	0.207112	6.38289	9.98058	0.723443	1.95358	7.2884e-16	seq3
A299	12	31075.1	0.347665	0.204891	0.177501	5.21283	3.7109	0.737689	1.04965	0	seq3
A300	12	32306.5	0.402509	0.179319	0.194062	8.31633	6.20349	0.707952	2.32029	0	seq3
A301	12	52772.6	0.378387	0.340623	0.200585	3.56726	11.8062	0.76453	1.1497	2.0939e-15	seq3
A302	12	30195.6	0.582079	0.207133	0.187979	8.11061	12.023	0.703175	2.57164	0	seq3
A303	12	16492.5	0.358895	0.10867	0.177838	9.85155	4.29307	0.66806	1.31214	0	seq3
A304	12	40889.5	0.336875	0.241355	0.19466	4.96424	8.21553	0.758593	1.1042	-1.56652e-15	seq3
A305	12	57851	0.422503	0.374462	0.220873	3.62388	12.9896	0.769433	1.2239	0	seq3
A306	12	16917.5	0.389924	0.114967	0.189097	9.86047	4.93128	0.67364	1.28825	0	seq3
A307	12	29202	0.421962	0.189586	0.371861	7.13943	8.35066	0.713991	1.22331	0	seq3
A308	12	34608.1	0.537152	0.23962	0.22526	6.56762	8.67186	0.734716	1.5774	-1.03888e-15	seq3
A309	12	14816.2	0.337446	0.0994318	0.19749	9.78806	4.18247	0.677208	1.40618	6.04068e-16	seq3
A310	12	19889.6	0.335505	0.131765	0.242459	7.60418	6.06143	0.699617	1.49772	-7.82683e-16	seq3
A311	12	43965.2	0.370739	0.262522	0.248381	4.93782	10.0002	0.751854	1.59397	0	seq3
A312	12	23638.3	0.405609	0.157007	0.2053	7.83616	4.9984	0.715972	1.30726	-5.43708e-16	seq3
A313	12	21403.2	0.346544	0.142194	0.23072	7.32247	4.5659	0.714709	1.51608	-5.13228e-16	seq3
A314	12	37022.1	0.456737	0.244323	0.194878	5.74707	7.53731	0.738863	1.39862	0	seq3
A315	12	60765.6	0.388522	0.402002	0.212208	3.06162	12.0698	0.775407	1.17477	-2.00446e-15	seq3
A316	12	19574.5	0.376988	0.12788	0.211892	8.94066	4.82657	0.682958	1.39202	5.28783e-16	seq3
A317	12	39704.9	0.340932	0.257227	0.234702	4.24494	11.3238	0.759195	1.08127	0	seq3
A318	12	16902.7	0.389523	0.11608	0.203216	9.52818	4.88789	0.670521	1.3435	0	seq3
A319	12	18005.3	0.374977	0.118811	0.207527	9.39903	4.44095	0.674989	1.5875	0	seq3
A320	12	18804.5	0.410925	0.122993	0.182967	10.0159	6.22986	0.678135	1.73905	0	seq3
A321	16	9183.78	0.502457	0.0675509	0.178568	17.765	5.06366	0.525756	2.52541	-2.7782e-16	seq3
A322	16	10301.2	0.531871	0.0765974	0.17659	16.5956	7.2901	0.528299	4.11768	2.36703e-16	seq3
A323	16	13398.8	0.518654	0.0939984	0.173015	14.1846	10.6683	0.556934	4.63606	2.87328e-16	seq3
A324	16	7954.85	0.4602	0.059356	0.178149	18.2606	5.3455	0.499221	2.69114	0	seq3
A325	16	13605.2	0.518893	0.0965037	0.163016	14.1947	7.57197	0.579138	2.45183	0	seq3
A326	16	7561.9	0.456893	0.0539077	0.168306	20.4468	3.24063	0.486955	2.15564	0	seq3
A327	16	12314.5	0.472375	0.0817751	0.170483	15.8319	11.5565	0.548325	4.95162	0	seq3
A334	16	8926.98	0.509309	0.0654982	0.173404	18.649	6.21859	0.523254	1.68128	0	seq3
A335	16	12214.3	0.539371	0.0799456	0.163437	18.5329	7.8667	0.54087	4.83927	-1.86645e-16	seq3
A336	16	12847	0.540808	0.0926578	0.170863	14.7749	13.4689	0.55354	6.16466	0	seq3
A336i	16	83754.6	0.492464	0.570973	0.171221	2.62582	14.8335	0.744915	1.28044	0	seq3
A337	16	6472.22	0.499783	0.0506327	0.179805	21.8213	3.40274	0.45617	2.29498	0	seq3
A338	16	11804.5	0.479858	0.0852195	0.18105	14.4765	9.21936	0.568828	3.43526	0	seq3
A339	16	7821.84	0.5021	0.0591503	0.177298	19.8619	3.43078	0.499209	2.13203	-2.42854e-16	seq3
A340	16	16122.2	0.559407	0.118839	0.190803	12.2796	6.16256	0.612358	1.82195	0	seq3
A341	16	11603.7	0.526873	0.0847	0.175207	15.5755	5.59084	0.554755	2.03444	3.12348e-16	seq3
A342	16	9351.98	0.486157	0.0646364	0.177006	19.3474	4.40764	0.518371	3.84856	0	seq3
A343	16	6881.04	0.512216	0.0536198	0.17589	21.3535	3.75935	0.466546	2.54608	0	seq3
A344	16	35892.6	0.514934	0.242321	0.17345	6.39863	3.91474	0.693725	0.954423	0	seq3
A345	16	21591.4	0.476079	0.150656	0.170036	8.94766	10.8299	0.64847	2.8111	0	seq3
A346	16	9322.33	0.527297	0.069983	0.180162	17.8666	5.06257	0.525328	2.13902	3.28076e-16	seq3
A347	16	9940.45	0.480074	0.0669634	0.187655	19.1157	4.46791	0.524984	4.52647	0	seq3
A348	16	9352.6	0.488396	0.0718926	0.167325	16.0378	6.21303	0.524493	2.86355	0	seq3
A349	16	9678.89	0.480899	0.0704519	0.17361	16.8517	5.85461	0.530441	3.00694	4.03616e-16	seq3
A350	16	18898.2	0.58208	0.129615	0.184582	12.5256	5.98359	0.613073	2.88613	0	seq3
A351	16	9164.35	0.466553	0.0677469	0.162568	16.977	4.91712	0.538877	2.3229	-3.11042e-16	seq3
A352	16	16336.7	0.484095	0.118118	0.171142	10.9875	6.38861	0.625892	3.03498	0	seq3
A353	16	8661.87	0.514219	0.0659742	0.175195	18.551	5.3841	0.507323	2.51726	2.62131e-16	seq3
A354	16	15664.5	0.497631	0.10613	0.18358	12.951	6.15447	0.58371	3.06081	-3.77193e-16	seq3
A355	16	18925	0.485793	0.122414	0.170943	12.0395	8.20057	0.61549	4.39009	0	seq3
A356	16	11146.8	0.483632	0.0793572	0.175173	15.7405	5.25817	0.554738	2.23407	0	seq3
A357	16	9668.33	0.481034	0.0671418	0.200441	18.3848	11.4084	0.521527	4.72476	-5.27284e-16	seq3
A358	16	15352.4	0.511985	0.108079	0.177161	12.7259	7.64254	0.582717	4.40066	0	seq3
A359	16	8790.54	0.458468	0.0616593	0.174033	19.1905	7.37238	0.508417	4.6677	0	seq3
A360	16	11017.2	0.524013	0.0802043	0.183733	16.683	4.09705	0.564389	1.73715	0	seq3
A361	16	8063.46	0.544572	0.0626708	0.18608	20.1805	5.1263	0.497863	2.52943	0	seq3
A362	16	7733.43	0.527494	0.0597198	0.179638	20.2255	6.54094	0.491369	2.92638	3.7121e-16	seq3
A363	16	15572	0.520858	0.0998247	0.184273	15.5606	6.70425	0.566498	4.65087	-2.2788e-16	seq3
A364	16	10629.9	0.506434	0.0786702	0.17874	16.1797	5.66048	0.54187	3.0703	0	seq3
A365	16	5932.55	0.508538	0.0475155	0.17938	23.3233	3.83447	0.447975	2.82174	-1.64175e-16	seq3
A366	16	7926.9	0.52461	0.0601846	0.178241	20.3471	5.81918	0.497864	3.24025	0	seq3
A367	16	7064.98	0.494238	0.0544205	0.17398	20.5047	4.31988	0.475896	3.06173	-2.6861e-16	seq3
A368	16	12383.8	0.496963	0.0829219	0.174656	16.3391	9.79108	0.559257	3.10568	0	seq3
A369	16	8080.15	0.537767	0.0616276	0.185872	20.3295	4.29641	0.496192	2.64774	0	seq3
A370	16	6672.87	0.507797	0.0523936	0.184497	21.583	5.13073	0.476348	3.03196	0	seq3
A371	16	10284.8	0.504483	0.0744656	0.177985	17.3418	5.25056	0.546751	3.10549	4.35766e-16	seq3
A372	16	7935.96	0.466061	0.0604605	0.268056	18.3708	5.61008	0.516695	3.18685	-1.98714e-16	seq3
A373	16	16204.4	0.576414	0.108996	0.179927	14.6402	12.609	0.58082	4.80696	0	seq3
A374	16	14844.5	0.529905	0.102089	0.172603	13.9324	13.8443	0.565047	4.87898	0	seq3
A375	16	14555.2	0.54134	0.104699	0.188152	13.8218	13.1622	0.586473	5.70312	3.78625e-16	seq3
A376	16	8736.39	0.492862	0.0658527	0.18202	18.1777	7.68415	0.521275	2.82715	-3.27073e-16	seq3
A377	16	9722.59	0.460544	0.072849	0.18251	15.803	4.43927	0.541456	2.52354	0	seq3
A378	16	9081.94	0.489247	0.0707776	0.181028	16.3445	7.0339	0.528584	2.79008	3.62058e-16	seq3
A379	16	7933	0.518317	0.0617064	0.18492	19.4097	5.3506	0.494715	2.51344	-2.64174e-16	seq3
A380	16	9005.06	0.533272	0.0678337	0.181559	18.6751	4.45014	0.520267	2.10227	-3.7975e-16	seq3
A381	16	13217.4	0.478388	0.0884222	0.178595	15.0031	8.90735	0.572674	3.75049	0	seq3
A382	16	9627.82	0.580035	0.0739944	0.174713	18.5084	11.8761	0.527822	3.57652	6.6914e-16	seq3
A389	16	13129.2	0.533102	0.100688	0.172843	13.2067	9.71595	0.568484	2.31576	0	seq3
A390	16	6915.75	0.451815	0.0551216	0.180597	18.5869	4.68794	0.488662	2.40197	-3.15508e-16	seq3
A391	16	11449.6	0.537824	0.0844906	0.179288	16.0448	7.78865	0.551904	3.49842	0	seq3
A392	16	7039.55	0.501124	0.0548208	0.166011	20.8658	3.51288	0.481204	2.33079	2.16953e-16	seq3
A393	16	9644.73	0.458344	0.0735131	0.15798	15.2696	4.93853	0.545187	2.02137	0	seq3
A394	16	9249.7	0.50863	0.0714698	0.163738	16.9886	7.70251	0.516706	4.28466	-2.15299e-16	seq3
A395	16	48342.2	0.46217	0.321204	0.201284	4.58161	8.78431	0.721229	1.21473	1.33179e-15	seq3
A396	16	10559.9	0.525656	0.0800385	0.166569	16.2758	4.49402	0.54302	2.01824	0	seq3
A397	16	11806.7	0.49733	0.0862499	0.174478	15.0716	10.6125	0.550429	4.98137	-2.68815e-16	seq3
A398	16	6414.87	0.484743	0.0481182	0.161183	23.4345	5.43519	0.45307	3.91094	1.67134e-16	seq3
A399	16	13275.1	0.518423	0.0954894	0.169237	14.4303	6.38758	0.572695	2.90397	0	seq3
A400	16	35608.5	0.495572	0.249209	0.170876	5.86067	5.51386	0.707267	1.69288	3.80608e-16	seq3
A401	16	9384.26	0.501696	0.067759	0.170645	18.9045	4.90209	0.536301	3.28779	-2.20432e-16	seq3
A402	16	8234.15	0.536	0.0643995	0.165781	19.3713	3.45458	0.496037	2.89556	-1.77583e-16	seq3
A403	16	13235.8	0.510407	0.0908242	0.175306	15.5902	5.97801	0.571685	3.55825	-3.34039e-16	seq3
A404	16	10423.6	0.489724	0.0750912	0.161214	16.7184	5.08648	0.550689	3.16101	2.20962e-16	seq3
A405	16	31761.7	0.439918	0.21901	0.154051	5.99906	8.69079	0.706794	1.34965	1.21154e-15	seq3
A406	16	8816.65	0.494903	0.0669661	0.169349	17.7124	5.28744	0.51544	3.26827	-2.05587e-16	seq3
A407	16	11097.5	0.520834	0.085	0.167945	15.4043	5.85673	0.562882	1.93711	0	seq3
A408	16	9685.88	0.458417	0.0712539	0.167482	16.3893	3.78245	0.528162	2.27557	0	seq3
A409	16	8099.56	0.542044	0.0635056	0.190433	20.0157	4.45386	0.503669	2.21365	-3.60341e-16	seq3
A410	16	123291	0.604865	0.82949	0.187612	2.38768	19.3823	0.755162	1.39927	0	seq3
A410i	16	17940.8	0.467632	0.126729	0.158411	10.38	6.04379	0.639306	2.14045	0	seq3
A411	16	16333.8	0.509795	0.112757	0.178248	12.2115	6.55599	0.596951	4.29071	-2.52594e-16	seq3
A412	16	7063.98	0.514308	0.0556617	0.166211	20.474	3.69068	0.469815	3.43179	0	seq3
A413	16	9216.8	0.507596	0.0718515	0.173337	16.968	4.74208	0.528772	2.15999	-3.46848e-16	seq3
A414	16	11591.6	0.531696	0.0863186	0.177844	15.5765	5.34249	0.557076	2.34688	0	seq3
A415	16	11848.7	0.496343	0.0804371	0.171725	17.2282	8.74132	0.551131	4.67109	0	seq3
A416	16	9544.56	0.527156	0.0758563	0.157583	16.3811	8.05882	0.521179	3.36286	5.24372e-16	seq3
A417	16	8077.28	0.489602	0.0629874	0.163114	18.4232	5.42487	0.502214	2.62681	4.98622e-16	seq3
A418	16	7692.96	0.507702	0.0610265	0.168029	19.582	5.52255	0.511566	1.92131	-6.69659e-16	seq3
A419	16	7555.68	0.498825	0.0590803	0.166238	19.6397	3.91184	0.493658	2.4136	1.88141e-16	seq3
A420	16	10432.1	0.49917	0.073874	0.166572	17.8839	3.95288	0.538363	2.96483	3.03143e-16	seq3
A421	16	7683.5	0.525789	0.0597567	0.173906	20.2304	3.55839	0.49336	2.50166	-1.99549e-16	seq3
A458	15	13076	0.293888	0.0944213	0.37387	9.01107	5.0467	0.68753	1.10474	0	seq3
A459	15	15629.8	0.278615	0.111494	0.308579	7.54063	5.96909	0.707601	1.71533	0	seq3
A460	15	15298.5	0.285515	0.10456	0.32693	8.60286	4.55661	0.694415	1.13342	6.87905e-16	seq3
A461	15	17262.5	0.367668	0.138536	0.244543	7.18195	5.3018	0.711004	1.11144	0	seq3
A462	15	15633.7	0.274487	0.114033	0.311934	7.07787	5.71488	0.707472	1.6222	0	seq3
A463	15	17862	0.237232	0.112041	0.334256	7.63611	4.6492	0.7097	1.84735	0	seq3
A464	15	17112.4	0.298725	0.119484	0.316861	7.84491	4.94174	0.711314	1.59696	0	seq3
A465	15	22424.7	0.23323	0.141029	0.315847	5.94822	4.44738	0.735199	1.18789	0	seq3
A466	15	21368.4	0.258715	0.140222	0.312696	7.40971	6.53999	0.711331	1.96212	0	seq3
A467	15	18799.4	0.285664	0.133904	0.327039	6.57749	6.17114	0.715063	1.46515	0	seq3
A468	15	18535.6	0.308605	0.127487	0.323214	7.6302	11.3972	0.707047	1.32856	0	seq3
A468i	15	61295.6	0.293611	0.432998	0.30092	2.21081	9.57699	0.788685	0.924766	0	seq3
A469	15	19906.4	0.278557	0.14109	0.323089	6.06659	4.58329	0.728689	1.01261	0	seq3
A470	15	17190.5	0.34803	0.121708	0.299073	8.67507	4.77863	0.691095	1.42672	0	seq3
A471	15	15382.3	0.261056	0.11258	0.291072	6.85845	5.7738	0.707356	1.60233	-7.68028e-16	seq3
A472	15	25466.4	0.222523	0.183664	0.309376	3.92633	4.31505	0.761651	1.11707	7.37046e-16	seq3
A473	15	42314.6	0.305189	0.290306	0.32529	3.58733	6.07452	0.767265	0.765765	1.5275e-15	seq3
A474	15	18764.5	0.263261	0.132376	0.360042	6.20942	5.69672	0.725361	1.35522	0	seq3
A475	15	31597.8	0.325258	0.230323	0.310237	4.34377	7.54073	0.759482	1.1044	0	seq3
A476	15	32618.7	0.532263	0.468282	0.307408	4.02898	11.5979	0.751532	1.44886	0	seq3
A477	15	25890.8	0.598353	0.369912	0.344533	5.84429	8.26714	0.739975	1.30244	0	seq3
A478	15	20227.7	0.620265	0.301671	0.326543	6.82975	4.53289	0.718884	1.26455	0	seq3
A479	15	22385.6	0.67505	0.351814	0.321087	6.01225	5.29308	0.730893	1.04228	-6.4397e-16	seq3
A480	15	28467.4	0.503616	0.439343	0.312427	3.74464	6.80744	0.76301	0.989789	-1.05454e-15	seq3
A480i	15	16347.2	0.604761	0.263594	0.311291	6.99811	6.00004	0.71251	2.34245	0	seq3
A481	15	14673.2	0.613245	0.237474	0.34715	7.86862	4.55169	0.698685	1.27752	6.10968e-16	seq3
A482	15	28971.1	0.648152	0.462303	0.316946	4.43704	6.32375	0.750558	1.20878	9.2954e-16	seq3
A483	15	14632.3	0.600634	0.226315	0.319707	8.30025	4.86093	0.692678	1.67812	0	seq3
A484	15	52865	0.625652	0.805627	0.322449	2.62649	14.0671	0.780323	0.997718	0	seq3
A485	15	55614.5	0.570211	0.881806	0.377166	2.11028	5.44357	0.789251	1.0397	0	seq3
A486	15	24517.7	0.585994	0.340039	0.31475	6.23249	5.93881	0.72089	1.91231	0	seq3

## Sheet: MetaData
	LA-ICP-MS U-Th-Pb data report
	Laboratory & Sample Preparation
	Laboratory name	FIERCE, Frankfurt Isotope & Element Research Center Goethe Univesität, Frankfurt am Main
	Sample type/mineral	Carbonate
	Sample preparation	polished thin sections
	Imaging	Petrographic microscope & 2400 dpi digital scan
	Laser ablation system
	Make, Model & type	RESOlution ArF excimer laser (COMpex Pro 102)
	Ablation cell	Two-volume ablation cell (Laurin Technic S155)
	Laser wavelength	193 nm
	Pulse width	20 ns
	Fluence	< 2 J/cm2
	Repetition rate	12 Hz
	Pre-ablation	4 pulses (same parameters as main ablation)
	Ablation duration	18 s
	Ablation rate	~ 0.6 μm/s
	Spot shape & size	Square, 213 mm (side)
	Sampling mode	Static spot ablation
	Gasses	Sample cell: He. Funnel: He + Ar. Tubbing: He + Ar + N
	Gas flows	He (300 ml/min), Ar (1100 ml/min), N (5 ml/min).
	ICP-MS Instrument
	Make, Model & type	ThermoScientific ElementXr sector field ICP-MS
	Sample introduction	Ablation aerosol
	RF power	1300 W
	Detection system	Secondary electron multiplier (with conversion dynode at -8kV). Simultaneous analogue and counting (pulse) modes of detection (conversion factors calculated per mass and applied offline). Magnetic field fixed. Detection by peak jumping with electrostatic analyzer.
	Masses measured	206, 207, 208, 232, 238
	Dwell times	206: 6.4 ms, 207: 7.5 ms, 208: 3.0 ms, 232: 2.0 ms, 238: 4.6 ms
	Samples per peak/integration type	4 for all masses/average
	Total time per run	99 ms
	Number of runs/total time	370 / 36.6 s
	Acquisition mode	Trigger from laser (20 s after pre-ablation), background: 18 s, ablation: 18 s
	Dead time	29 ns
	Data Processing
	Gas blank	20 s on-peak zero subtracted.
	Calibration strategy	- Primary RM: NIST SRM-614 - Offset RM: WC-1 - Validation RM: ASH15D, and inhouse RM: NAMA and Zechstein dolomite (ZD)
	Reference Material (RM) information	Soda-lime glass NIST SRM-614, WC-1 (Roberts et al., 2017), ASH15D (Vaks et al., 2003), ZD (in-house Zechstein dolomite RM; 252-258 Ma), NAMA (in-house calcite/dolomite RM, Nambia Cambrian-Precambrian boundary: c. 538-542 Ma).
	Data processing / LIEF correction	In-house VBA spreadsheet program (Gerdes and Zeh, 2006, 2009). Intercept method for LIEF correction, assumes cPb corrected WC-1 and samples behave identically.
	Mass discrimination	²⁰⁷Pb/²⁰⁶Pb (0.5 - 0.9%) and ²⁰⁶Pb/²³⁸U (5 - 15%) normalised to primary RM. Matrix offset (calculated from offset RM): 4%
	Common-Pb correction	No common-Pb correction applied to the data.
	Uncertainty level & propagation	Uncertainties are quoted at 2δ absolute and are propagated by quadratic addition of the within run precision, counting statistics, background, and the excess of scatter (calculated from the primary RM). In addition, an excess of variance of 0.75 % (1δ), calculated from the offset RM, was added quadratically to the ²⁰⁶Pb/²³⁸U ratios. Systematic uncertainties are reported as an expanded uncertainty…
	Quality control / Validation	Sequence 1: WC-1: 254.2 ± 1.3 Ma (2s, MSWD = 1.0, n = 23) ZD: 256.1 ± 5.6 Ma (2s, MSWD = 0.95, n = 20) Sequence 2: WC-1: 254.1 ± 2.3 Ma (2s, MSWD = 1.0, n = 22) NAMA: 537.0 ± 9.1 Ma (2s, MSWD = 1.3, n = 25) Sequence 3: WC-1: 254.1 ± 1.4 Ma (2s, MSWD = 1.0, n = 26) ASH15D: 3.00 ± 0.12 Ma (2s, MSWD = 0.56, n = 26) (Ages are the 206Pb/238U lower intercept ages of the calculated isochrons with the co…
	Other information

## Sheet: G50960
Gasparrini, M., et al., 2023, Dolomite recrystallization revealed by Δ47/U-Pb thermochronometry in the Upper Jurassic Arab Formation, United Arab Emirates: Geology, https://doi.org/10.1130/G50960.1
